# Supplementary material
Source: Springer Nature journal article supplement (https://www.springermedizin.de/resource/supplementary/12885_2014_5198_MOESM17_ESM.pdf/9468570)

**ADDITIONAL FILE 17. FREQUENCY OF CONFIRMED SOMATIC MUTATIONS BY ION TORRENT (A) AND MISEQ (B).**

**A.**

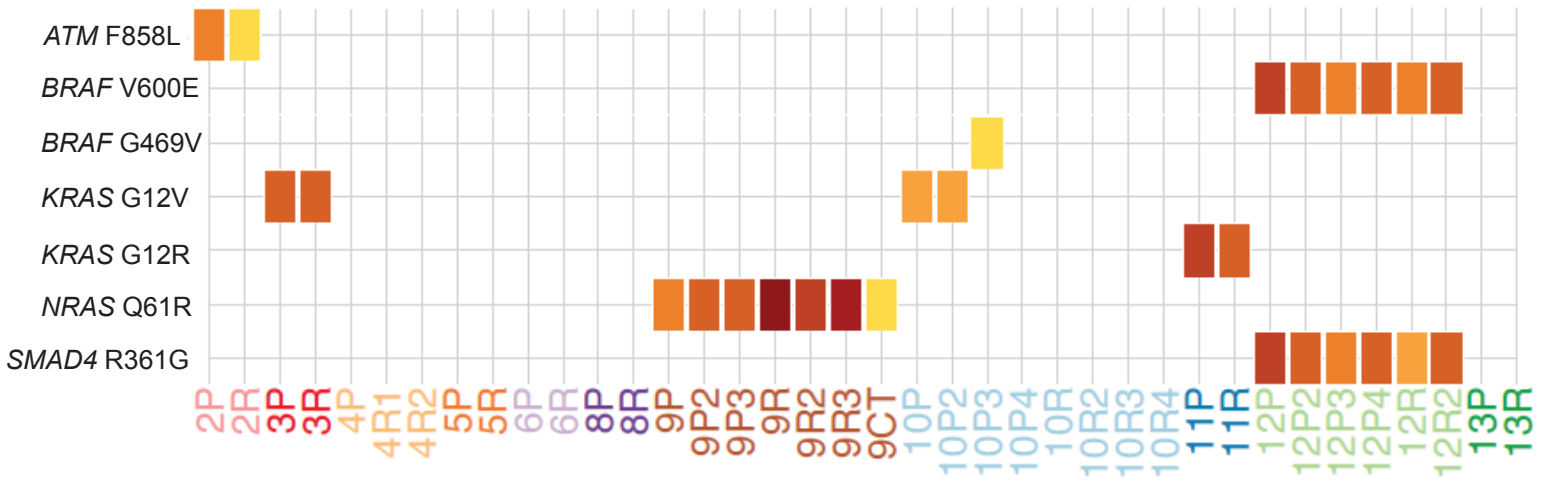

**B.**

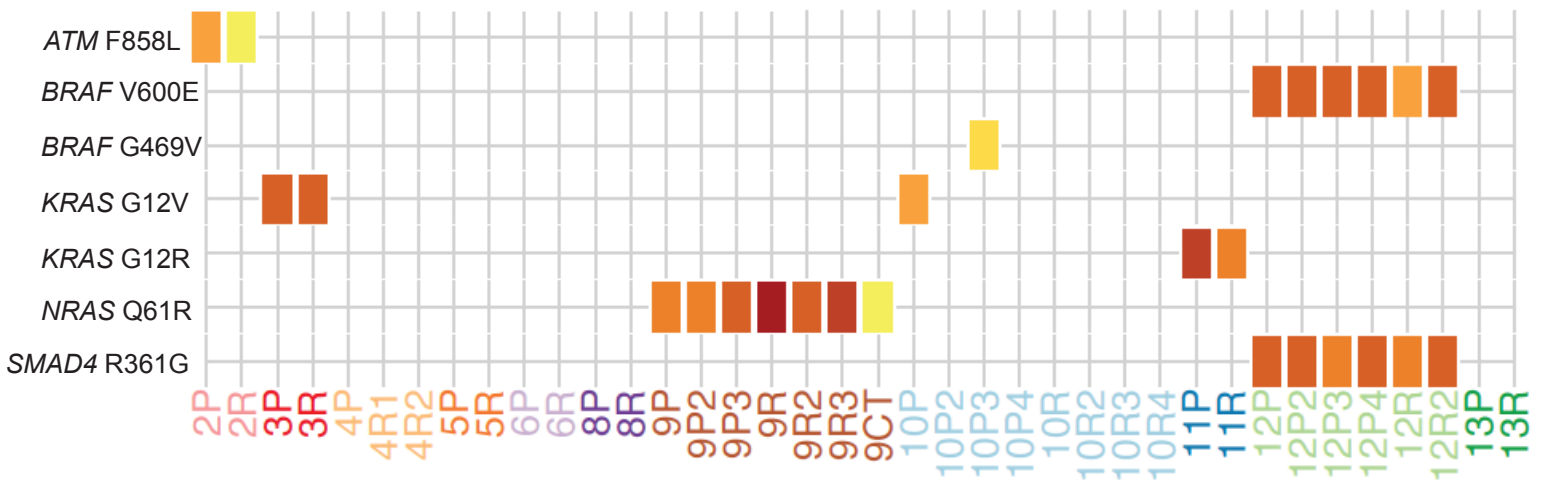

Mutation Frequency

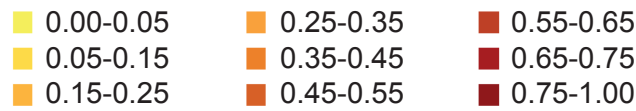

Supplement: MOESM17 [file 9468570]
